# Supplementary material for: RNA-Sequencing Analysis of Adrenocortical Carcinoma, Pheochromocytoma and Paraganglioma from a Pan-Cancer Perspective
Source: PubMed Central journal article supplement (PMC6315481; doi:10.3390/cancers10120518), 2018-12-15
Supplement: cancers-10-00518-s001.pdf [file cancers-10-00518-s001.pdf]

# Supplementary Materials: RNA-Sequencing Analysis of Adrenocortical Carcinoma, Pheochromocytoma and Paraganglioma from a Pan-Cancer Perspective

Joakim Crona, Samuel Backman, Staffan Welin, David Taïeb, Per Hellman, Peter Stålberg, Britt Skogseid and Karel Pacak

## Abbreviations:

### Abbrev. Definition

#### TCGA Nomenclature

|      |                                                                  |
|------|------------------------------------------------------------------|
| TCGA | the Cancer Genome Atlas                                          |
| ACC  | Adrenocortical carcinoma                                         |
| BLCA | Bladder urothelial carcinoma                                     |
| BRCA | Breast invasive carcinoma                                        |
| CESC | Cervical squamous cell carcinoma and endocervical adenocarcinoma |
| CHOL | Cholangiocarcinoma                                               |
| COAD | Colon adenocarcinoma                                             |
| DLBC | Lymphoid neoplasm diffuse large B-cell lymphoma                  |
| ESCA | Esophageal carcinoma                                             |
| GBM  | Glioblastoma multiforme                                          |
| HNSC | Head and neck squamous cell carcinoma                            |
| KICH | Kidney chromophobe                                               |
| KIRC | Kidney renal clear cell carcinoma                                |
| KIRP | Kidney renal papillary cell carcinoma                            |
| LAML | Acute myeloid leukemia                                           |
| LGG  | Brain lower grade glioma                                         |
| LIHC | Liver hepatocellular carcinoma                                   |
| LUAD | Lung adenocarcinoma                                              |
| LUSC | Lung squamous cell carcinoma                                     |
| MESO | Mesothelioma                                                     |
| OV   | Ovarian serous cystadenocarcinoma                                |
| PAAD | Pancreatic adenocarcinoma                                        |
| PRAD | Prostate adenocarcinoma                                          |
| READ | Rectum adenocarcinoma                                            |
| SARC | Sarcoma                                                          |
| SKCM | Skin cutaneous melanoma                                          |
| STAD | Stomach adenocarcinoma                                           |
| TGCT | Testicular germ cell tumors                                      |
| THCA | Thyroid carcinoma                                                |
| THYM | Thymoma                                                          |
| UCEC | Uterine corpus endometrial carcinoma                             |
| UCS  | Uterine carcinosarcoma                                           |
| UVM  | Uveal melanoma                                                   |

#### Non TCGA Nomenclature

|          |                                                                      |
|----------|----------------------------------------------------------------------|
| CoC      | Cluster of clusters                                                  |
| NBL      | Neuroblastoma                                                        |
| NET      | Neuroendocrine tumor                                                 |
| PPGL     | Pheochromocytoma and Paraganglioma                                   |
| Cortical | Cortical admixture PPGL                                              |
| Hypoxia  | Pseudohypoxic PPGL                                                   |
| Kinase   | Kinase signaling PPGL                                                |
| PCC      | Pheochromocytoma                                                     |
| PGL      | Paraganglioma                                                        |
| TARGET   | Therapeutically Applicable Research to Generate Effective Treatments |
| Wnt      | wnt-altered PPGL                                                     |



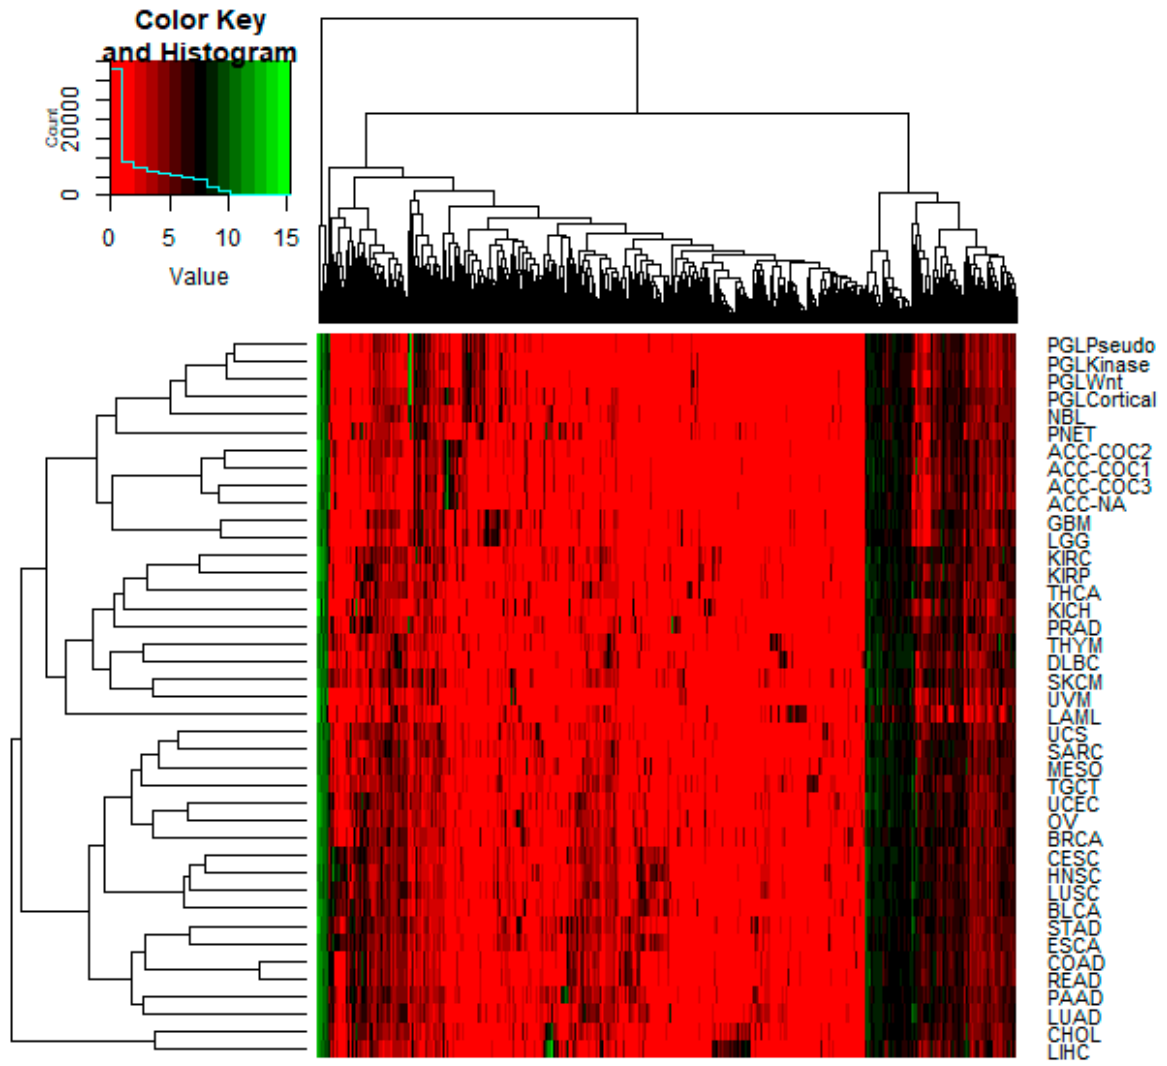

**Supplementary Figure S2.** Bioinformatics pipeline 2. 1975 transcripts selected. Unsupervised clustering of 35 TCGA tumor categories with adrenal tumors annotated accordingly to molecular subtype.





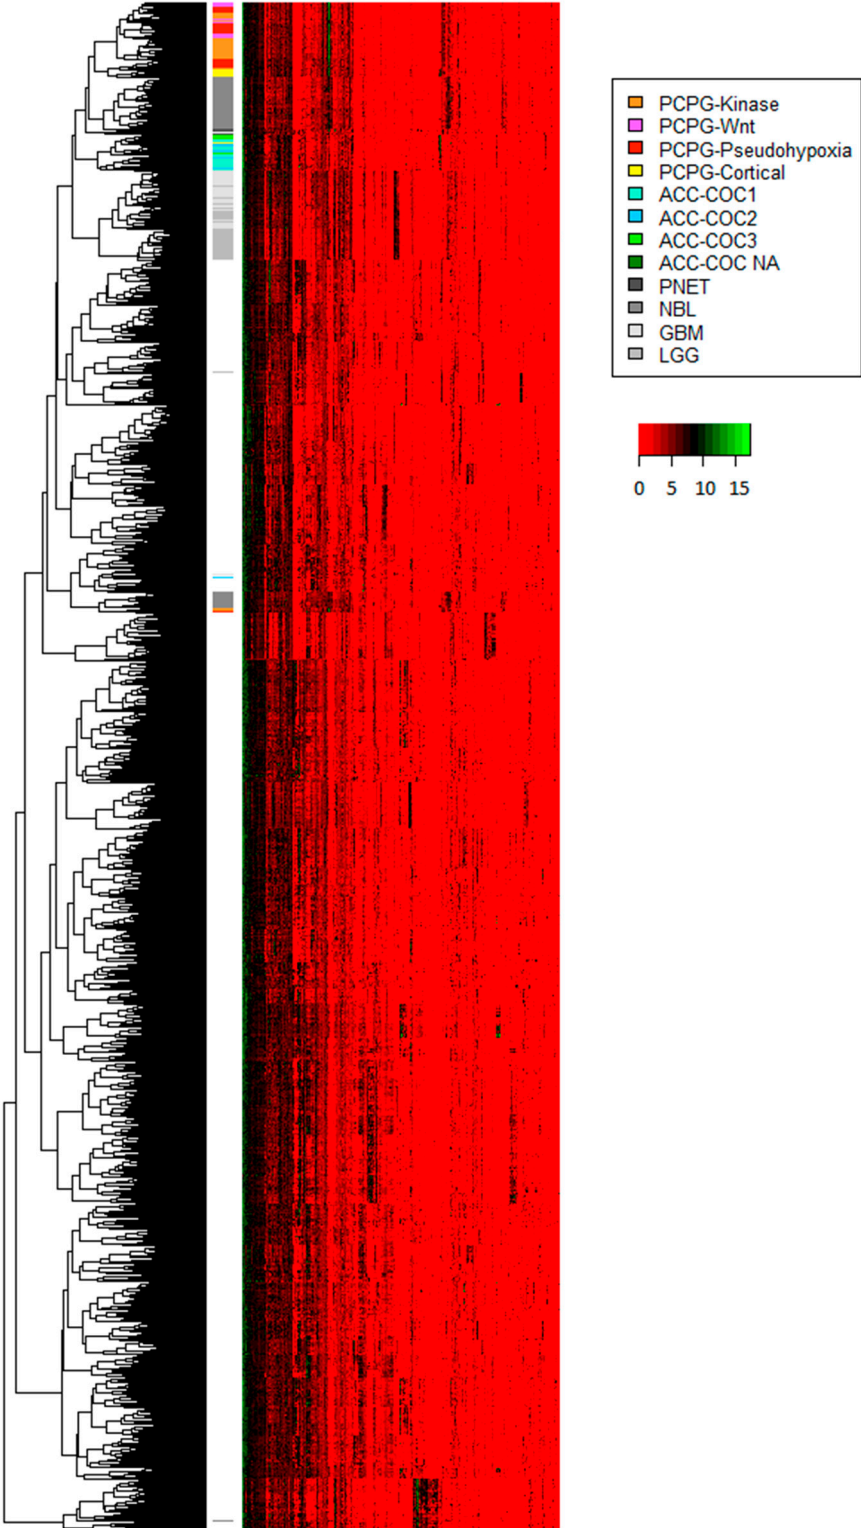

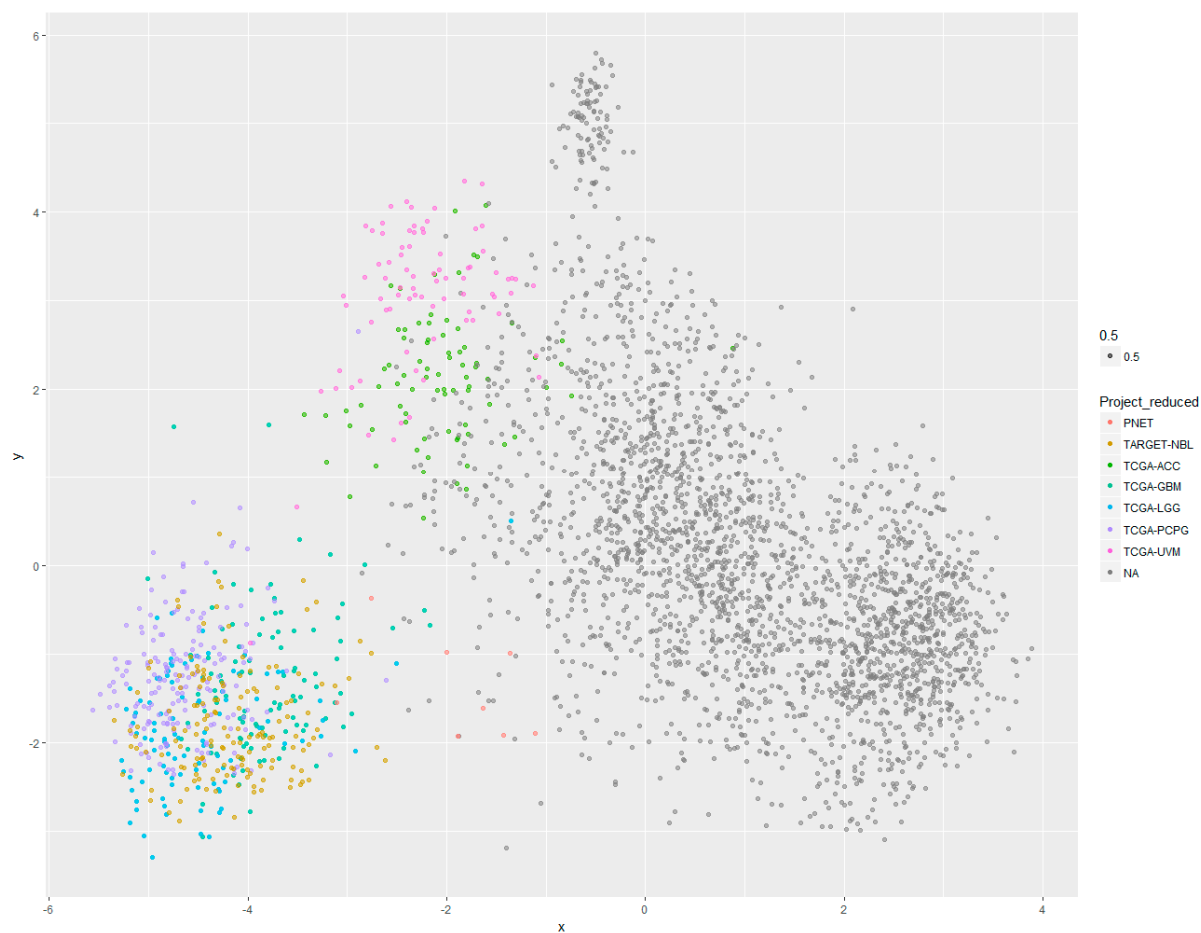

**Supplementary Figure S4. (A)** Bioinformatics pipeline 2. 1975 transcripts selected. Unsupervised hierarchical clustering of 3319 samples annotated for TCGA tumor category with selected tumors annotated accordingly to molecular subtype. **(B)** Bioinformatics pipeline 2. Principal component analysis of 3319 samples with selected tumors annotated for TCGA or TARGET tumor category.



### Supplementary figure 5A, 1620 transcripts, SARC+ACC

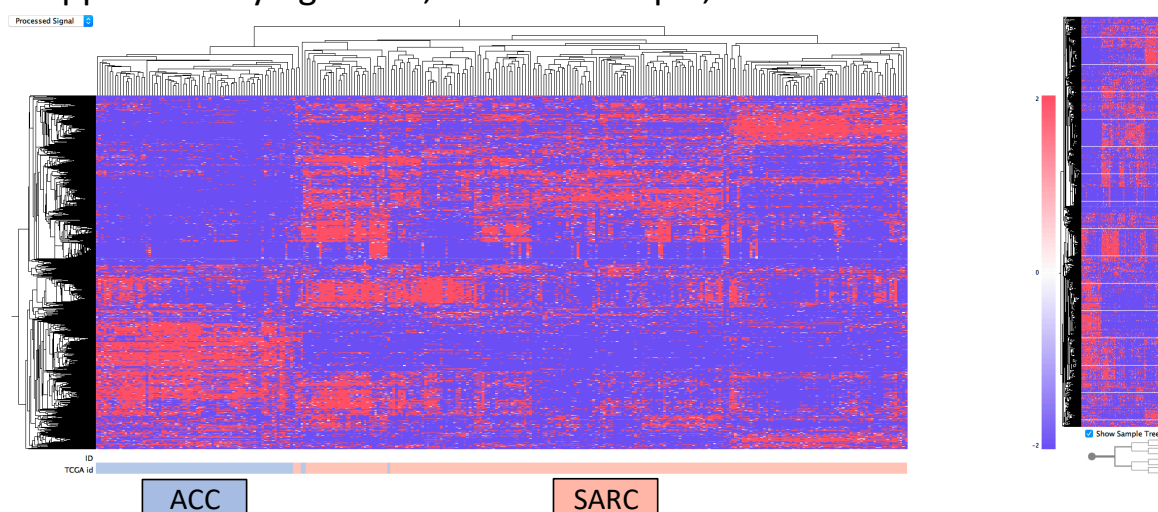

### Supplementary figure 5B, 2638 transcripts, SARC+ACC

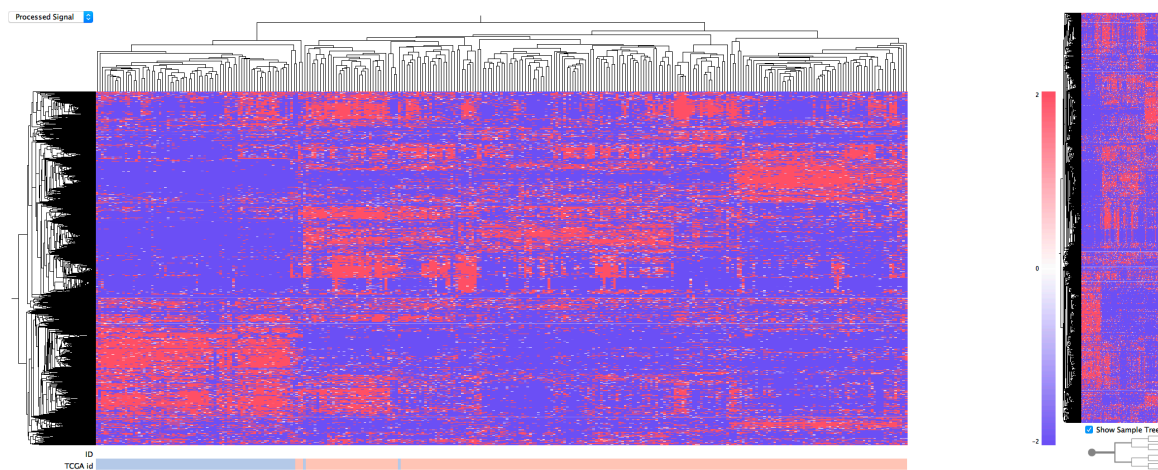

### Supplementary figure 5C, 3918 transcripts, SARC+ACC

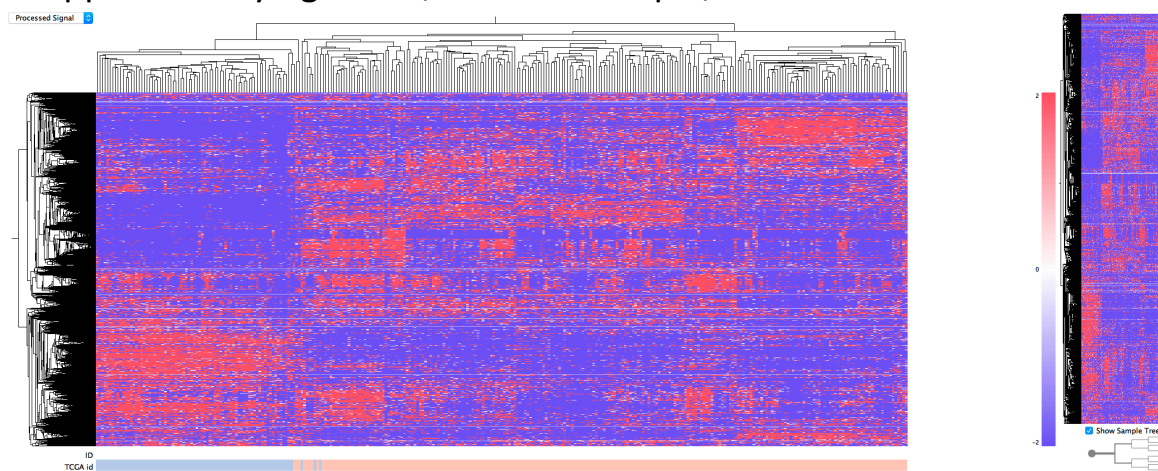

**Supplementary Figure S5.** Bioinformatics pipeline 1. Unsupervised hierarchal clustering of all ACC and SARC samples available in the TCGA database.

### Supplementary figure 6A, 1390 genes, No molecular subtypes

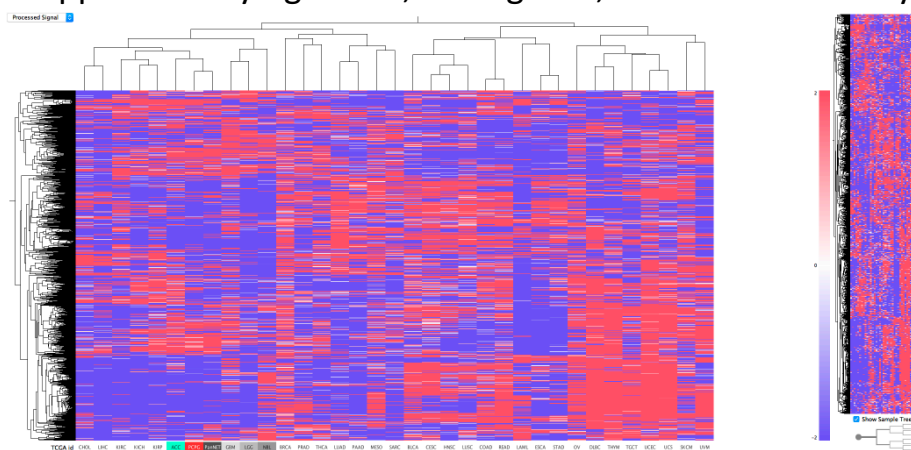

### Supplementary figure 6B, 1946 genes, No molecular subtypes

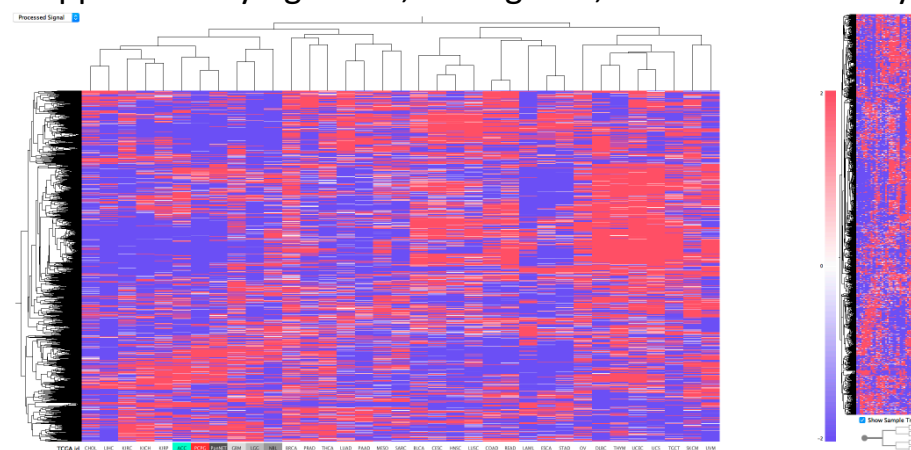

### Supplementary figure 6C, 3111 genes, No molecular subtypes

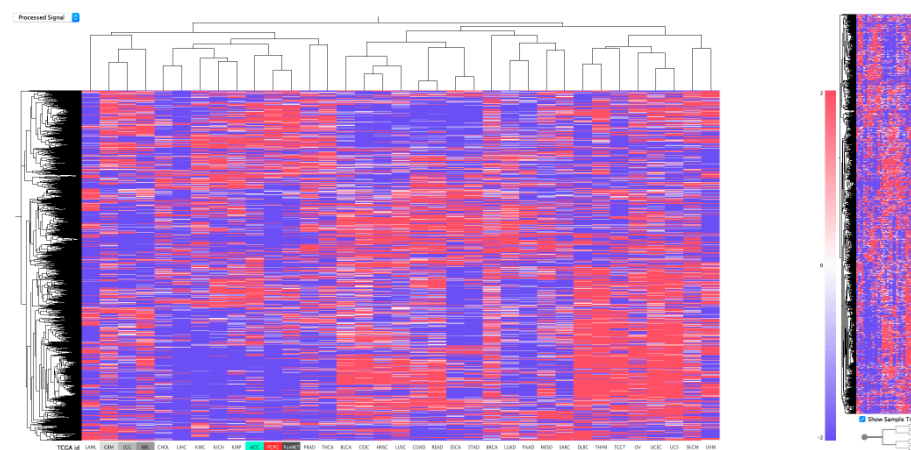

**Supplementary Figure S6.** Bioinformatics pipeline 1. Unsupervised clustering of 35 TCGA tumor categories as well as 8 PAAD samples annotated as PNET.



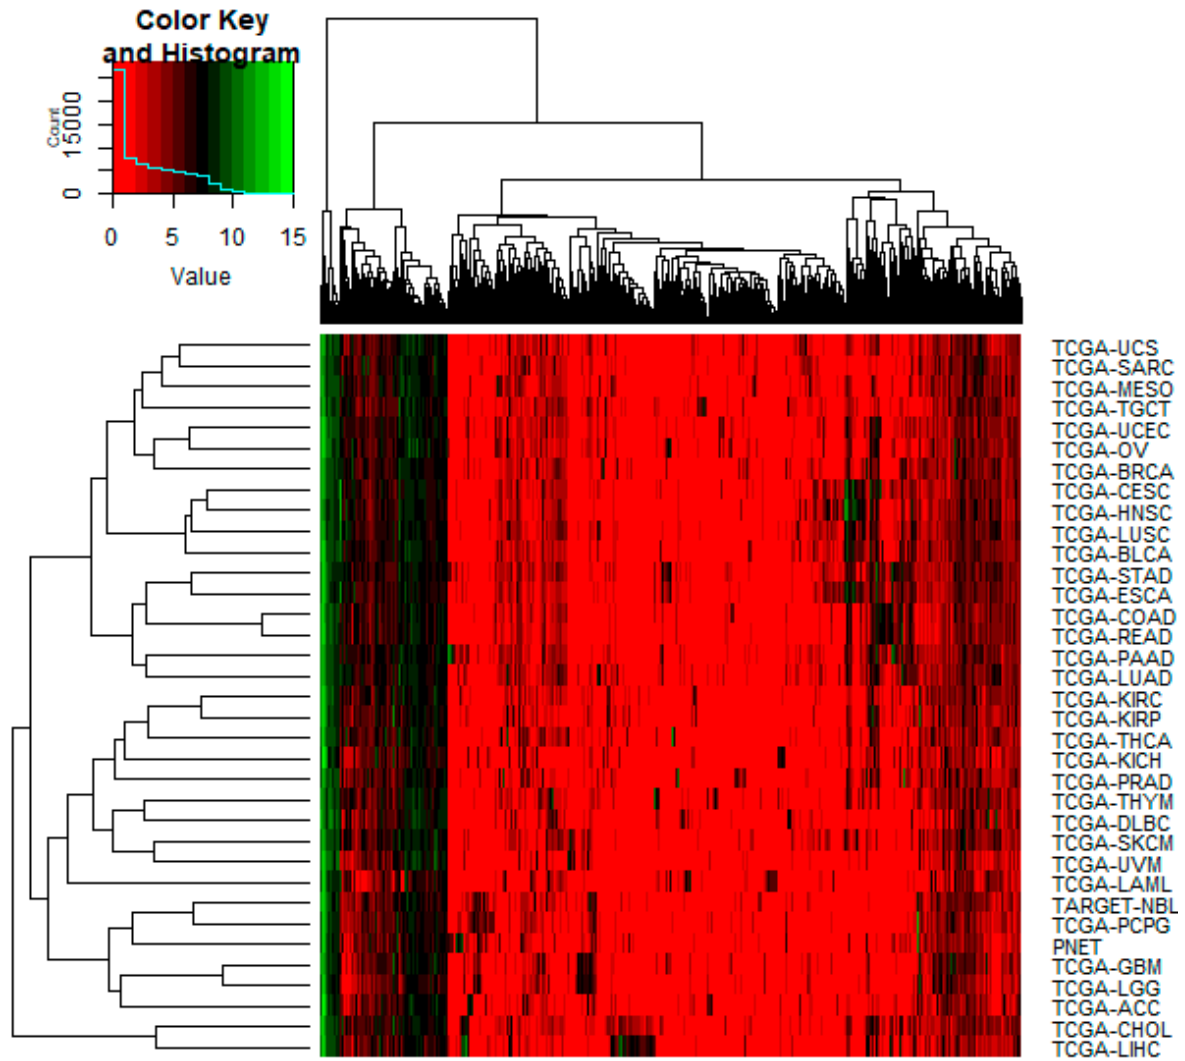

**Supplementary Figure S7.** Bioinformatics pipeline 2. 1975 transcripts selected. Unsupervised clustering of 35 TCGA tumor categories as well as 8 PAAD samples annotated as PNET.

## Supplementary Figure 8, 1941 transcripts, Molecular subtypes Pheochromocytoma samples removed

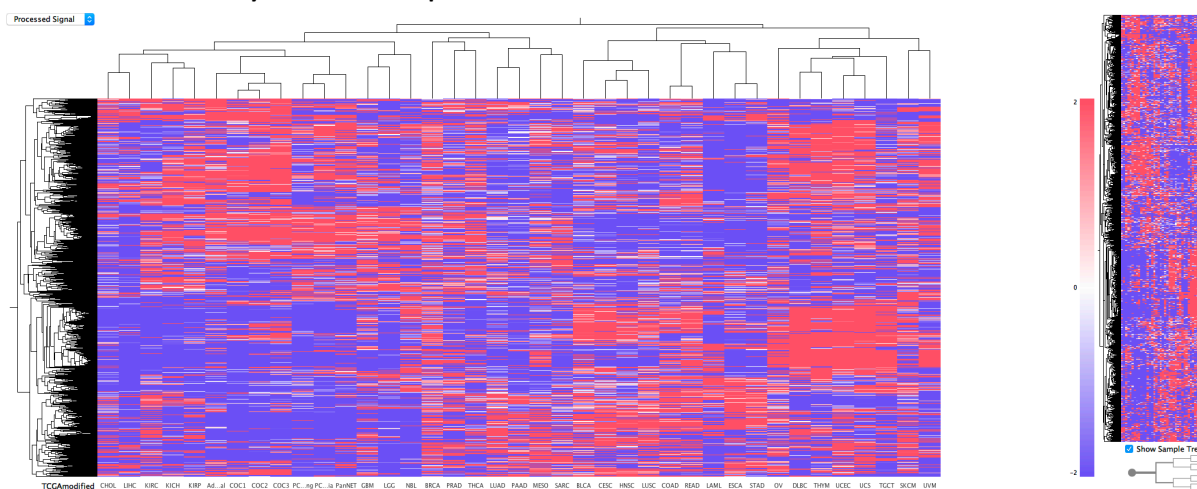

**Supplementary Figure S8.** Bioinformatics pipeline 1. Unsupervised hierarchical clustering based on transcriptome data from 35 TCGA tumor categories with adrenal tumors annotated accordingly to molecular subtype. All samples in the PPGL cohort labeled as pheochromocytoma were removed.

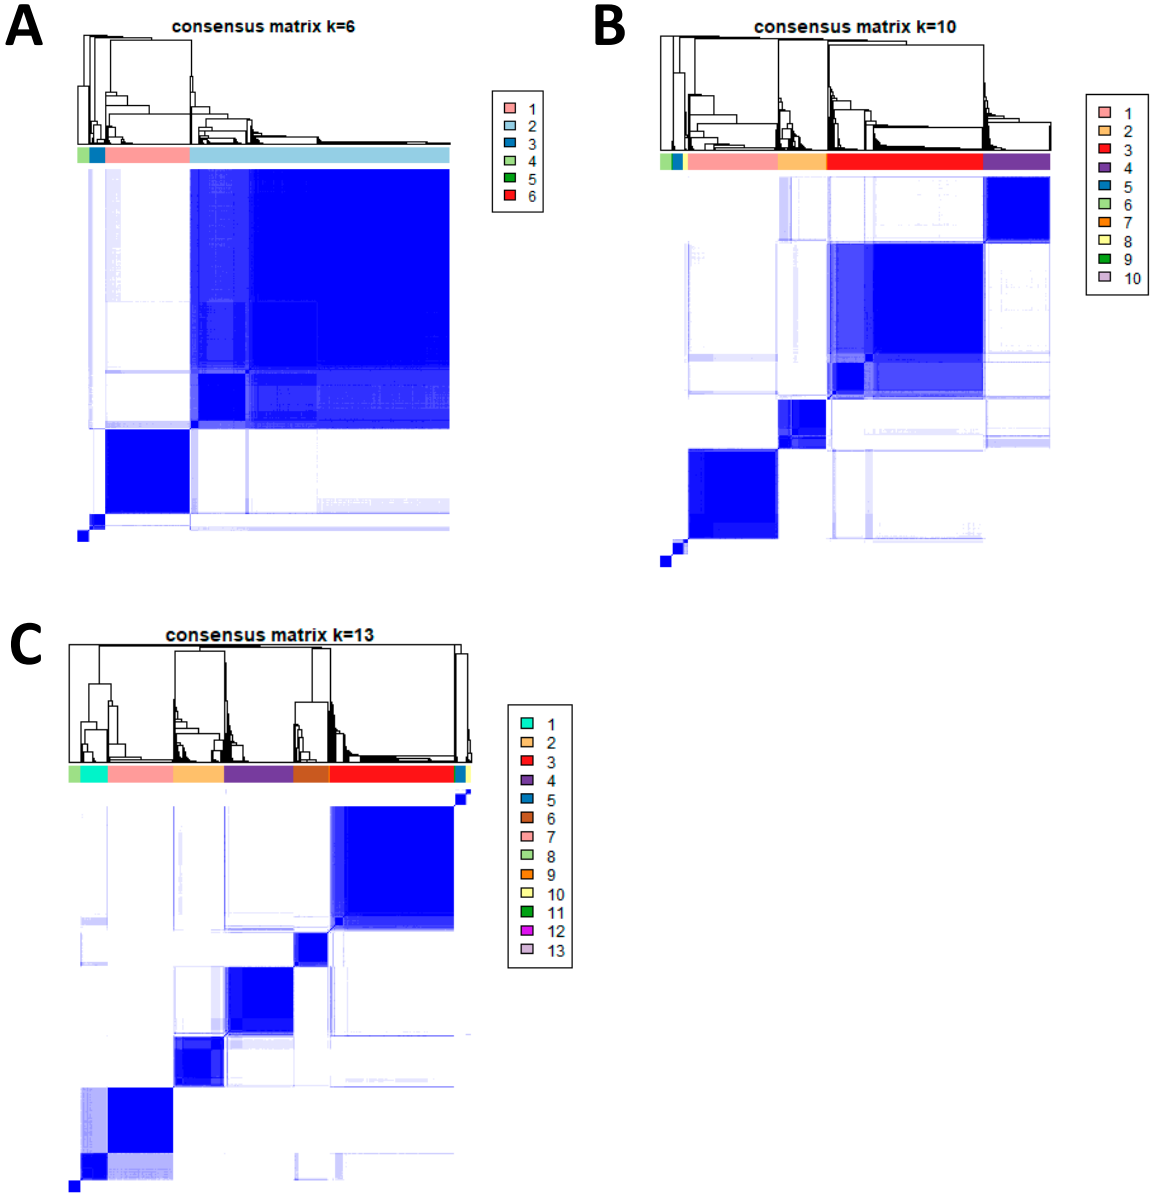

**Supplementary Figure S9.** Consensus matrices of unsupervised cluster of cluster classification of 3319 TCGA and TARGET samples.

### Supplementary figure 10A, 1516 transcripts, PPGL+PNET

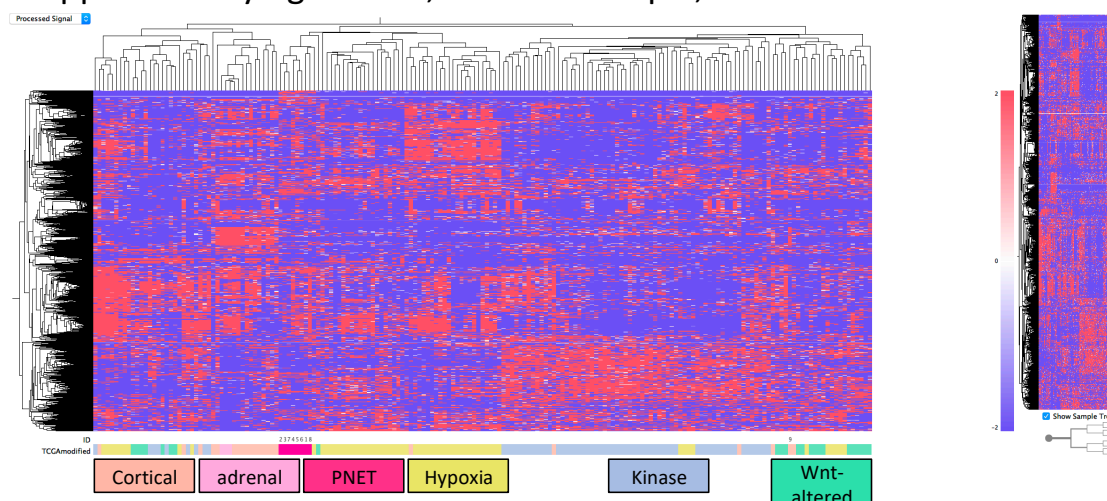

### Supplementary figure 10B, 2277 transcripts, PPGL+PNET

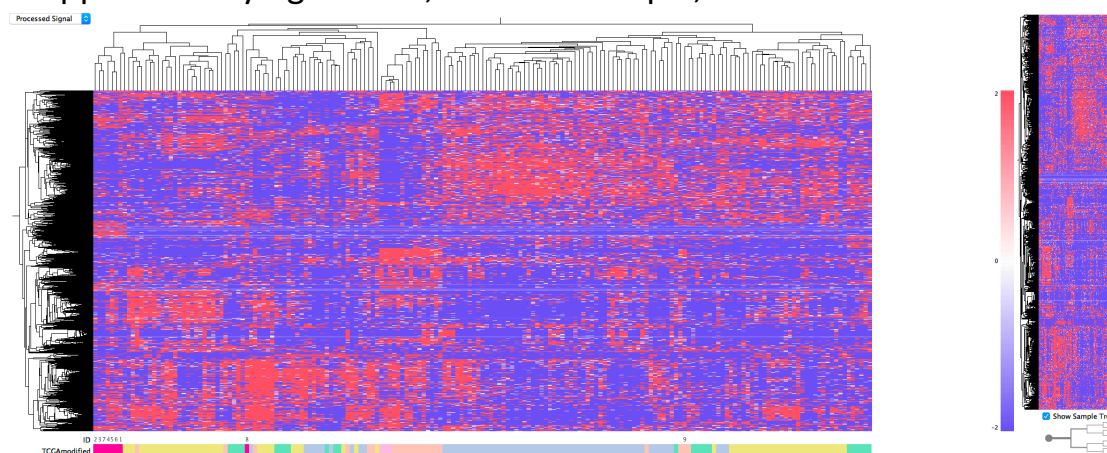

### Supplementary figure 10C, 4482 transcripts, PPGL+PNET

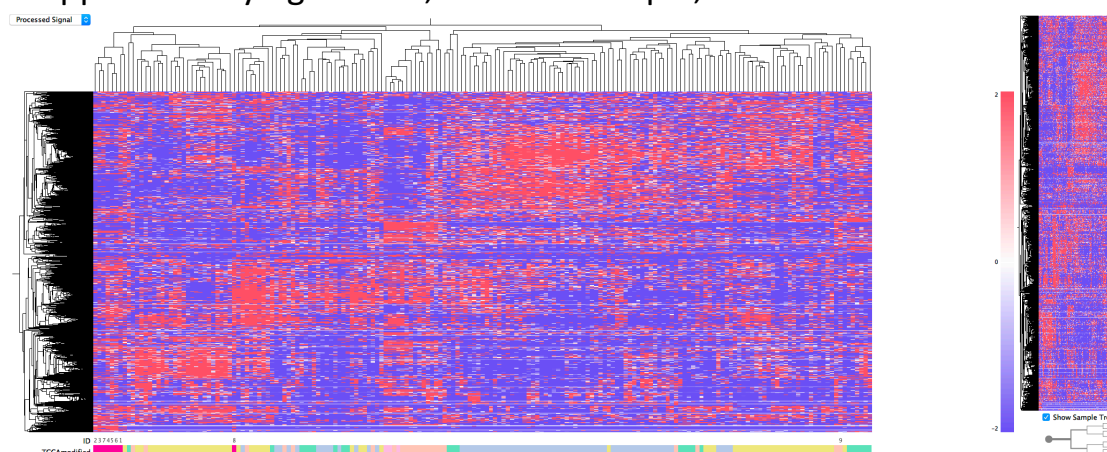

**Supplementary Figure S10.** Bioinformatics pipeline 1. Unsupervised hierarchal clustering of all PPGL as well as 8 PAAD samples annotated as PNET.



Supplementary figure 11A, 1591 genes, GBM (n=150), LGG (n=150)  
NBL (n=156), PNET (n=8), PPGL (n=152).

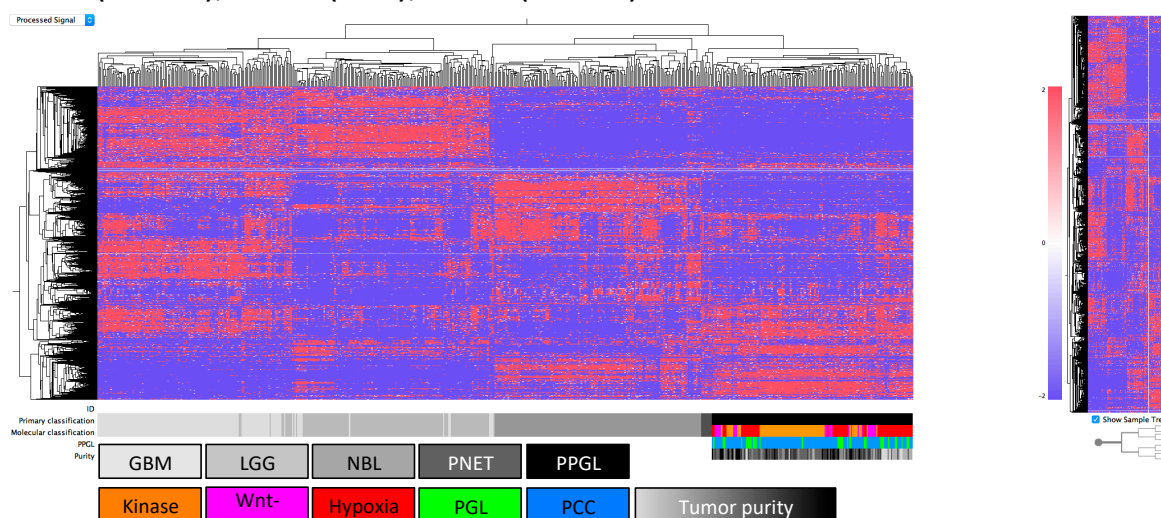

Supplementary figure 11B, 2181 genes

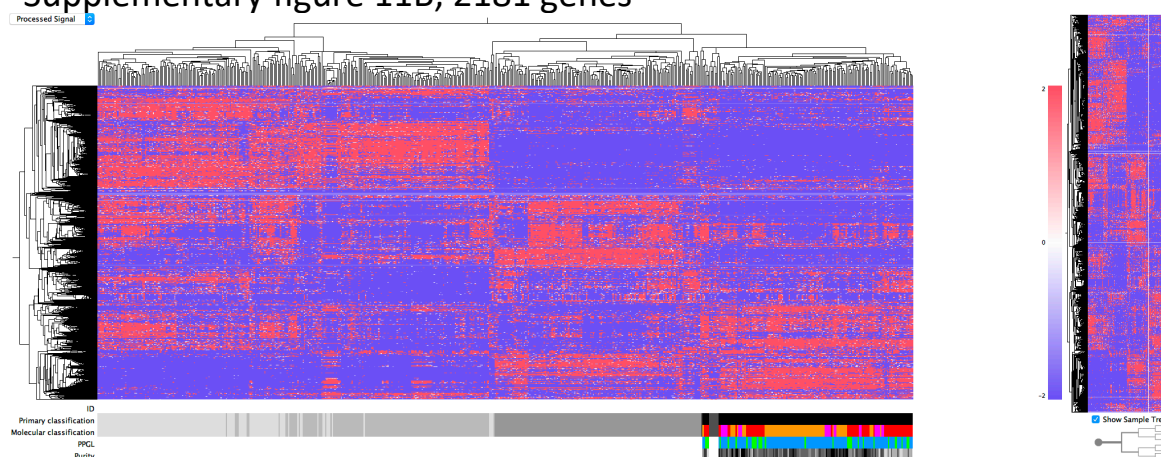

Supplementary figure 11C, 3326 genes, Molecular subtypes

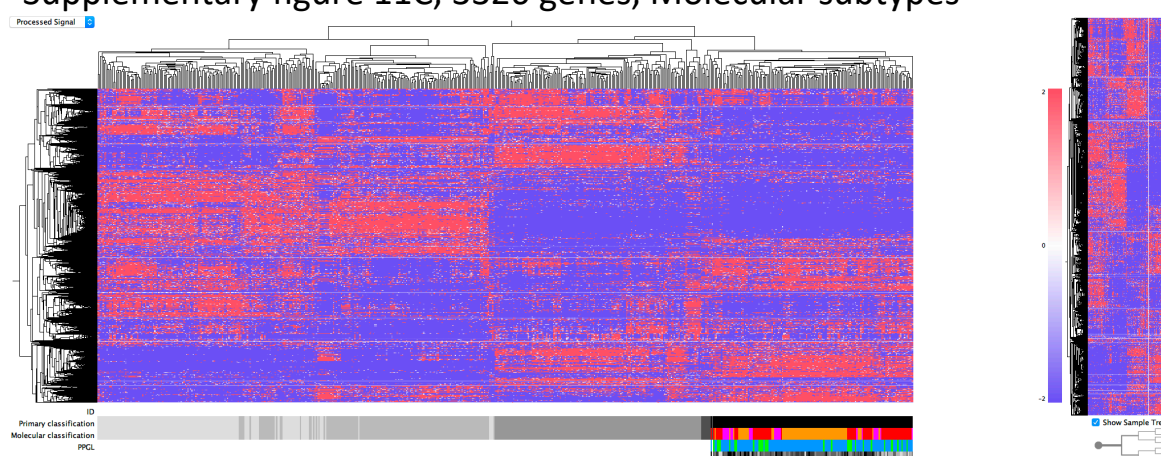

**Supplementary Figure S11.** Unsupervised hierarchal clustering of GBM, LGG, NBL, PNET and PPGL (minus cortical admixture subgroup).

**Table S1a.** Genes preferentially expressed in Adrenocortical carcinoma (ACC) as well in as neural crest tumors (glioblastoma, low grade glioma, neuroblastoma, pancreatic neuroendocrine tumor and pheochromocytoma and paraganglioma).

| Gene Name      | ACC, Mean | Glioblastoma, Mean | Low Grade Glioma, Mean | Pheochromocytoma and Paraganglioma, Mean | Neuroblastoma, Mean | Pancreatic Neuroendocrine Tumor, Mean | Remaining Tumors, Mean | ACC fold Difference to Non Neural Crest Tumors | ACC fold Difference to Neural Crest Tumors | Area Under the Curve |
|----------------|-----------|--------------------|------------------------|------------------------------------------|---------------------|---------------------------------------|------------------------|------------------------------------------------|--------------------------------------------|----------------------|
| <i>SYP</i>     | 39.5      | 13.4               | 35.7                   | 132.2                                    | 51.5                | 82.0                                  | 0.9                    | 59.74                                          | 0.56                                       | 0.989                |
| <i>DNER</i>    | 31.0      | 74.5               | 137.1                  | 66.2                                     | 17.7                | 16.3                                  | 1.4                    | 116.40                                         | 0.34                                       | 0.977                |
| <i>BEX1</i>    | 105.7     | 104.8              | 205.5                  | 396.6                                    | 254.0               | 386.0                                 | 7.9                    | 112.33                                         | 0.28                                       | 0.975                |
| <i>NDRG4</i>   | 43.3      | 22.5               | 48.8                   | 86.2                                     | 47.0                | 13.0                                  | 2.1                    | 25.28                                          | 0.36                                       | 0.975                |
| <i>TERF2IP</i> | 49.3      | 38.9               | 64.7                   | 116.7                                    | 75.7                | 74.2                                  | 21.9                   | 2.37                                           | 0.67                                       | 0.967                |
| <i>TSPAN7</i>  | 75.0      | 67.3               | 152.5                  | 74.5                                     | 53.0                | 58.3                                  | 9.1                    | 18.02                                          | 0.92                                       | 0.965                |
| <i>CHGB</i>    | 113.3     | 5.0                | 32.6                   | 7914.0                                   | 353.4               | 2446.9                                | 5.2                    | 266.45                                         | 0.24                                       | 0.958                |
| <i>VWA5B2</i>  | 40.3      | 0.6                | 1.7                    | 86.1                                     | 9.3                 | 45.7                                  | 0.3                    | 190.60                                         | 3.22                                       | 0.957                |
| <i>VAT1L</i>   | 18.1      | 8.2                | 25.5                   | 89.6                                     | 60.7                | 19.9                                  | 1.5                    | 19.24                                          | 0.11                                       | 0.952                |
| <i>EEF1A2</i>  | 153.3     | 59.9               | 67.7                   | 550.2                                    | 447.2               | 347.9                                 | 20.9                   | 46.06                                          | 0.24                                       | 0.937                |
| <i>STMN3</i>   | 52.6      | 74.6               | 104.7                  | 112.3                                    | 131.8               | 103.7                                 | 21.3                   | 2.85                                           | 0.33                                       | 0.934                |
| <i>QDPR</i>    | 22.5      | 35.0               | 44.1                   | 150.2                                    | 40.2                | 94.0                                  | 14.2                   | 2.11                                           | 0.48                                       | 0.924                |
| <i>ENO2</i>    | 31.1      | 60.4               | 75.0                   | 119.4                                    | 128.1               | 103.9                                 | 16.2                   | 2.25                                           | 0.22                                       | 0.924                |
| <i>SARAF</i>   | 192.2     | 163.3              | 167.7                  | 242.9                                    | 163.6               | 262.4                                 | 82.6                   | 2.37                                           | 0.98                                       | 0.916                |
| <i>RTL8C</i>   | 169.2     | 192.0              | 178.7                  | 202.5                                    | 126.8               | 111.2                                 | 78.2                   | 2.25                                           | 0.92                                       | 0.904                |

**Table S1b.** Go-enrichment analysis of genes co-expressed in Adrenocortical carcinoma (ACC) and glioma (glioblastoma and low grade glioma) and neuroendocrine tumors (neuroblastoma, pancreatic neuroendocrine tumor and pheochromocytoma and paraganglioma).

| GO-Term    | GO-Name                        | Qualifier   | Count | Percentage | Gene Names                                                         |
|------------|--------------------------------|-------------|-------|------------|--------------------------------------------------------------------|
| GO:0005515 | protein binding                | enables     | 8     | 53         | <i>EEF1A2, SARAF, ENO2, EEF1A2, VAT1L, CHGB, NDRG4, BEX1, DNER</i> |
| GO:0005737 | cytoplasm                      | part_of     | 6     | 40         | <i>ENO2, QDPR, STMN3, EEF1A2, NDRG4, BEX1</i>                      |
| GO:0016020 | membrane                       | part_of     | 5     | 33         | <i>SARAF, ENO2, TSPAN7, DNER, SYP</i>                              |
| GO:0016021 | integral component of membrane | part_of     | 4     | 27         | <i>SARAF, TSPAN7, DNER, SYP</i>                                    |
| GO:0043025 | neuronal cell body             | part_of     | 3     | 20         | <i>ENO2, EEF1A2, DNER</i>                                          |
| GO:0043005 | neuron projection              | part_of     | 3     | 20         | <i>QDPR, STMN3, SYP</i>                                            |
| GO:0005829 | cytosol                        | part_of     | 3     | 20         | <i>ENO2, QDPR, NDRG4</i>                                           |
| GO:0016491 | oxidoreductase activity        | enables     | 2     | 13         | <i>QDPR, VAT1L</i>                                                 |
| GO:0055114 | oxidation-reduction process    | involved_in | 2     | 13         | <i>QDPR, VAT1L</i>                                                 |
| GO:0030154 | cell differentiation           | involved_in | 2     | 13         | <i>NDRG4, BEX1</i>                                                 |
| GO:0006897 | endocytosis                    | involved_in | 2     | 13         | <i>DNER, SYP</i>                                                   |
| GO:0070062 | extracellular exosome          | part_of     | 2     | 13         | <i>ENO2, QDPR</i>                                                  |
| GO:0043209 | myelin sheath                  | part_of     | 2     | 13         | <i>EEF1A2, ENO2</i>                                                |
| GO:0005886 | plasma membrane                | part_of     | 2     | 13         | <i>ENO2, DNER,</i>                                                 |
| GO:0005789 | endoplasmic reticulum membrane | part_of     | 2     | 13         | <i>SARAF, NDRG4</i>                                                |
